1 **Title page**

2 **Full Title of Article:** ‘The illness isn’t the end of the road’ - Patient perspectives on the initiation of and  
3 early participation in a multi-disease, community-based exercise programme

4

5 **Short Title of Article:** Patient perspectives on a multi-disease, community-based exercise programme

6

7 **Joanne Regan-Moriarty<sup>1\*</sup>, Sarah Hardcastle<sup>2</sup>, Maire McCallion<sup>1</sup>, Azura Youell<sup>1</sup>, Audrey Collery<sup>3</sup>, Andrew  
8 McCarren<sup>4</sup>, Niall Moyna<sup>5\*</sup>, Brona Kehoe<sup>6</sup>**

9

10 <sup>1</sup> Department of Health and Nutritional Science, Atlantic Technological University, Sligo

11 <sup>2</sup> Academy of Sport and Physical Activity, Sheffield Hallam University

12 <sup>3</sup> Primary Care, Health Service Executive, Sligo

13 <sup>4</sup> School of Computing, Dublin City University

14 <sup>5</sup> School of Health and Human Performance, Dublin City University

15 <sup>6</sup> Department of Sport and Exercise Science, South East Technological University

16

17 \* Corresponding authors

18 E-mail: [joanne.regan@atu.ie](mailto:joanne.regan@atu.ie) (JRM)

19 E-mail: [niall.moyna@dcu.ie](mailto:niall.moyna@dcu.ie) (NM)

## 20 **Abstract**

21 **Background:** Exercise is the cornerstone of cardiac rehabilitation (CR). Hospital-based CR exercise  
22 programmes are a routine part of clinical care and are typically 6-12 weeks in duration. Following  
23 completion, physical activity levels of patients decline. Multi-disease, community-based exercise  
24 programmes (MCEP) are an efficient model that could play an important role in the long-term  
25 maintenance of positive health behaviours in individuals with cardiovascular disease (CVD) following their  
26 medically supervised programme.

27 **Aim:** To explore patients experiences of the initiation and early participation in a MCEP programme and  
28 the dimensions that facilitate and hinder physical activity engagement.

29 **Methods:** Individuals with established CVD who had completed hospital-based CR were referred to a  
30 MCEP. The programme consisted of twice weekly group exercise classes supervised by clinical exercise  
31 professionals. Those that completed (n=31) an initial 10 weeks of the programme were invited to attend  
32 a focus group to discuss their experience. Focus groups were transcribed and analysed using reflexive  
33 thematic analysis.

34 **Results:** Twenty-four (63% male, 65.5±6.12yrs) patients attended one of four focus groups. The main  
35 themes identified were 'Moving from Fear to Confidence', 'Drivers of Engagement,' and 'Challenges to  
36 Keeping it (Exercise) Up'.

37 **Conclusion:** Participation in a MCEP by individuals with CVD could be viewed as a double-edged sword.  
38 Whilst the programme clearly provided an important transition from the clinical to the community setting,  
39 there were signs it may breed dependency and not effectively promote independent exercise. Another  
40 novel finding was the use of social comparison that provided favourable valuations of performance and  
41 increased exercise confidence.

## 42 Introduction

43 In Ireland, over 268,000 live with cardiovascular disease (CVD), of which 67,000 have coronary  
44 artery disease [1]. With a growing and aging population [2], the prevalence of CVD is predicted to continue  
45 to rise [3], which will place a substantial burden on the Irish healthcare system. Physical activity is well  
46 established as an effective intervention in the secondary prevention of CVD [4]. It is the cornerstone of  
47 hospital-based cardiac rehabilitation (CR) programmes which are effective in the prevention of further  
48 cardiac events [3, 5]. Hospital-based CR programmes are part of routine clinical care delivered by health  
49 care professionals (HCP) but are short term, structured and of fixed duration (6-12 weeks) [6, 7]. They  
50 aim to *'improve the physical and emotional health and quality of life of patients'* [8] to facilitate the patient  
51 to resume an active and functional life [9] following a cardiac event. Following completion of hospital-  
52 based CR, physical activity levels can decline, with only 25-40% maintaining exercise six months post CR  
53 [10] and the health-related benefits achieved can be lost [11]. The uptake of long-term maintenance  
54 programmes (such as phase IV community-based CR (CBCR) programmes) could act as a vehicle to  
55 maintain exercise behaviour [12] and those that do transition into CBCR have been shown to have better  
56 health outcomes [11]. CBCR can provide a safe and effective exit route from hospital-based programmes  
57 [13]. The accessibility of community programmes and the potential for long term/continual service  
58 provision is likely to support the habituation of exercise and maintenance of associated health benefits  
59 [14]. Patients have expressed how the community setting promotes a sense of 'normality' within the  
60 rehabilitation experience, distinguishing exercise as a normal behaviour as opposed to a treatment for  
61 their condition [13]. However, it is estimated that only 5-20% of eligible CR patients are still attending  
62 maintenance/CBCR programmes [15] at 6 months.

63 Limited studies have focused on the facilitators of adherence to CBCR programmes [16-19]. These  
64 studies identified the social nature of the programme as a powerful motive for long-term exercise

65 maintenance referring to the support given by instructors and exercising alongside people with similar  
66 health problems. Participants also valued the support and encouragement given by family and friends.  
67 The group class was a strong facilitator with many referring to the routine associated with a scheduled  
68 exercise time[19, 18], the novel exercises giving a new dimension to their physical activity [18] and the  
69 enjoyment of taking part in the class [18, 17, 19, 16]. Another factor driving long-term exercise  
70 maintenance was the importance of being able to spend time with family, being able to travel, and being  
71 able maintain independence [19]. Ability to avoid ill health, indicating that health was perceived to be in  
72 their control, was also evident [19, 17, 18, 16]. Lack of knowledge, lack of social support, poor health, and  
73 lack of medical support are described as key barriers to initiation of a CBCR[10]. Barriers to adherence  
74 include travel and lack of appropriate locations/time, other health problems, time constraints such as  
75 family/work commitments, and weather as key barriers [16, 20].

76 All these studies, however, involved participants that were attending for between 12 months[16,  
77 18, 20] to 2+ years [17, 19], who were in true “maintenance” stage of change in terms of their exercise  
78 behaviour. There is value in understanding participants’ motivations for and barriers to adhering to the  
79 exercise programmes at different time points [17]. Research into such programmes has consistently  
80 shown that dropout is highest within the first three months [21, 22].

81 Uptake to maintenance CBCR programmes is hindered by the inadequate availability of such  
82 services [23, 24] with the majority of these programmes delivered by HCPs such as physiotherapists[25,  
83 26], GPs [27] or a multidisciplinary team including cardiologists, physiotherapist, CR nurses and exercise  
84 physiologists [16, 28]. Traditionally long-term exercise programmes have been delivered for individual  
85 CDs such as CR and pulmonary rehabilitation. However, the role of exercise as an adjunctive therapy in  
86 the management of a range of CDs is well documented [29]. As these rehabilitative programmes have  
87 comparable designs and target similar components of fitness irrespective of the CD [30], there is scope to  
88 establish multi-disease, community-based exercise programmes (MCEP), which would be a more efficient

89 delivery model and could be used as an alternative to CBCR. No research to date has explored the  
90 perceptions of individuals with CVD integrating into a MCEP.

91 This present study aimed to explore patients experiences of the initiation and early participation  
92 in a MCEP programme and the dimensions that facilitate and hinder physical activity engagement in  
93 individuals with CVD.

## 94 **Methodology**

### 95 **Participants**

96 Adults with established CVD who had completed hospital-based CR at Sligo University Hospital  
97 (SUH) were referred to a MCEP at the Knocknarea Sports Arena, on the Atlantic Technological University  
98 (ATU) Sligo campus. Patients meeting the inclusion criteria for category B CVD of the National Exercise  
99 Referral Framework [31] (those who do not require the presence of a physician or other appropriately  
100 trained HCP i.e. advanced cardiac life support (ACLS) or equivalent, to undertake a supervised exercise  
101 programme) were referred by the senior cardiac physiotherapist at SUH. Some had completed their  
102 hospital-based CR prior to the MCEP being established but were subsequently referred once established,  
103 while others were referred directly following completion of their hospital-based CR. Participants were  
104 informed of the research study and provided with a plain language participant information leaflet.  
105 Participants were required to provide written informed consent prior to participation. The study  
106 conformed to the Standards for Reporting Qualitative Research [32] (S1 Appendix). Ethical approval was  
107 obtained from SUH Research Ethics Committee (REF No.: 579). A total of 51 cardiac patients were referred  
108 and commenced the MCEP between the 6<sup>th</sup> of June 2016 and the 19<sup>th</sup> of September 2017. At 10 weeks,  
109 31 participants were still attending the MCEP and were invited to attend a focus group.

## 110 **Multi-disease, community-based exercise programme**

111 The MCEP inducted new participants three times a year. The programme was offered to  
112 participants with a range of chronic diseases and primarily received referrals of patients with CVD, stroke,  
113 multiple sclerosis, Parkinson’s disease, musculoskeletal, inflammatory bowel disease, and Type 2 Diabetes  
114 Mellitus.

115 Exercise classes consisted of twice weekly 60-minute supervised group exercise delivered by  
116 clinical exercise professionals at a participant-to-instructor ratio of 15:1 [33]. At least one instructor was  
117 a Health and Exercise Scientist with level 4 cardiac exercise instructors’ qualification from the British  
118 Association for Cardiovascular Prevention and Rehabilitation (BACPR). The classes consisted of a  
119 combination of aerobic and local muscular endurance (LME) exercises and included a 15 min warm-up  
120 and 10 min cool-down as per standard CR guidelines [33]. Participants completed a pre-exercise health  
121 check before each class and the physiotherapists were available on-site for the health check in the first  
122 2-3 weeks of any newly inducted cohort and remotely thereafter. Classes finished with a social gathering  
123 with refreshments provided. Two educational workshops took place over each 10-week period delivered  
124 by a health care or exercise professional. Topics covered included adopting a healthy lifestyle, the  
125 importance of taking their medication, practical nutrition advice.

126 Prior to starting the programme all participants underwent an induction where they completed a  
127 series of physiological tests measuring functional capacity, anthropometrics along with assessments of  
128 their health and wellbeing. Repeat assessments were performed at 10 weeks.

## 129 **Focus groups**

130 Four focus groups with four to eight participants (mixed gender) per group and a single interview  
131 (due to work commitments) were conducted. Using a phenomenological approach, the focus groups  
132 aimed to explore participant opinions/experiences of participating in the first 10 weeks of a MCEP. A topic

133 guide (S2 Appendix) was developed based on Braun and Clarke [34] to guide focus group discussions.  
134 Topics included the journey to MCEP, experience of the programme, the exercise class, factors that  
135 facilitated participation in the programme, perceived benefits of the MCEP setting and recommendations  
136 for exercise programme improvements. Discussions were not limited to these areas and opportunity was  
137 provided for the exploration of other/wider topics identified by participants.

138 Focus groups and the interview were conducted by two trained independent researchers that had  
139 not been involved in the delivery of the MCEP. One acted as the moderator who introduced the session  
140 and followed the topic guide, while the second was the assistant moderator and manually recorded the  
141 key discussion points. Focus groups lasted approximately 45 min and were held in a meeting room in the  
142 exercise facility at ATU Sligo, the same building where the exercise classes took place to ensure the setting  
143 was familiar to the participants. Focus groups were digitally recorded, transcribed verbatim and  
144 anonymised with each participant given a unique code.

## 145 **Authors experience with MCEPs**

146 There was differing levels of experience with MCEPs between the key researchers who analysed  
147 the data. JRM had been part of establishing and operating the MCEP and has a background in exercise  
148 physiology. Due to her closeness to the day-to-day running of the programme she represented an 'insider'  
149 perspective[35] in the analysis of the data. MMcC represented an 'outsider' perspective[35] as she was  
150 not involved in MCEP though does have a strong background in public health/health promotion and  
151 qualitative research methods. In the later phases, BK and SH contributed to the analysis. BK has expertise  
152 in establishing and operating other MCEPs. SH has a wealth of experience and expertise in qualitative  
153 design and analysis. Neither BK or SH had direct involvement in the operation of the local programme or  
154 data collection, so both were deemed to contribute an 'outsider' perspective. Having both an insider and

155 outsider perspective strengthened the study design[36] giving a more reflective and varied viewpoint  
156 during analysis.

## 157 Data analysis

158 Data was inductively analysed following the six phases of reflexive thematic analysis as outlined  
159 by Braun and Clarke [37, 38]. In the first phase both researchers (JRM & MMcC) *familiarised* themselves  
160 with the transcripts by manually listening back to the audio tapes. In the second phase, transcripts were  
161 discussed jointly to *generate representative codes*. The third phase involved the generation of *Initial*  
162 *themes* followed by in-depth discussion between the researchers where they *reviewed and developed* the  
163 themes (Phase 4). At this point another perspective was brought in to give a fresh viewpoint (BK) before  
164 phase 5 took place, *refining, defining, and naming* of the themes to ensure all themes correctly reflected  
165 the transcripts. The thematic analysis report (phase 6) was drafted (JRM), discussed and revised (JRM,  
166 MMcC, BK, SH) with key quotations selected (JRM) for each theme.

## 167 Results

168 Twenty-four (77%) of invited participants took part in the study. Characteristics of participants  
169 are presented in Table 1.

170 **Table 1: Participant characteristics**

|                                                               |           |
|---------------------------------------------------------------|-----------|
| <i>N</i>                                                      | 24        |
| <i>Age (yr)</i>                                               | 65.5±6.12 |
| <i>Gender, M:F</i>                                            | 15:9      |
| <i>BMI (kg·m<sup>2</sup>)</i>                                 | 29.3±4.7  |
| <b><i>Cardiac History</i></b>                                 |           |
| <i>Myocardial Infarction</i>                                  | 13 (54%)  |
| <i>Percutaneous Coronary Intervention (PCI) with stent</i>    | 16 (67%)  |
| <i>Coronary artery bypass graft (CABG)</i>                    | 4 (17%)   |
| <i>Percutaneous Coronary Intervention (PCI) without stent</i> | 3 (13%)   |



171 *Valve Replacement* 5 (21%)

Values are expressed as absolute values (percentage) or mean  $\pm$  standard deviation

172

173 Three major themes were identified: 'Moving from Fear to Confidence', 'Drivers of Engagement,'  
174 and 'Challenges to Keeping it (Exercise) Up'. S3 Appendix provides an overview of themes, subthemes  
175 and supporting quotes.

## 176 **Moving from Fear to Confidence**

177 This theme contained four sub-themes; Fear and uncertainty; Need for continuity; Increase in  
178 confidence; and Life beyond illness.

### 179 **Fear and uncertainty**

180 Despite undertaking 10 weeks hospital-based CR prior to the MCEP many participants expressed  
181 fear and uncertainty in exercising independently. Participants knew they should be active but described  
182 feelings of fear or nervousness towards exercise '*Yes, fear is the thing, in case we overdo it.*' (P3 FG1).  
183 They were fearful of overexerting themselves, exacerbating their condition or inducing symptoms of their  
184 condition '*I was wondering would it bring on the pain, the angina I had*' (P6 FG1) and '*once this [the cardiac  
185 event] happened, I was afraid to walk*' (F3 FG3). Many clearly recalled their period of ill health.

186 Participants were uncertain of how to exercise independently following the hospital-based  
187 programme: '*sure, I wouldn't know what I needed to do*' (M3 FG4). This manifested as low exercise  
188 confidence '*Well, I thought I mightn't be able to do much, or I wouldn't be able to manage it [exercise]*'  
189 (M1 FG4).

### 190 **Need for continuity**

191 There was a strong sense that participants wanted to maintain their exercise after hospital-based  
192 CR but needed support in doing so. There was a desire and perceived need for follow-on supervised

193 exercise opportunities ‘...it was something we were waiting for, all of us.’ (P1 FG1). Many were referred  
194 directly from the hospital-based CR to the MCEP and referenced the continuity of care. ‘*The continuity*  
195 *and the link between the hospital and yourselves [the MCEP] is critical, it’s really important.*’ (M3, FG4).

196 The access to medical support if they ‘*felt a wee pain*’ or had a particular worry provided  
197 significant reassurance. Although not always on site, it was enough to know the medical support was  
198 there if needed it ‘*We’ve got that link. We don’t want to lose that support now that we have it.*’ (M1, FG3).  
199 For some, this had been their second cardiac event and they commented ‘*there was nothing*’ there after  
200 their first experience of CR in the hospital.

201 Although there was evidence of some being active without the MCEP, this was primarily walking  
202 or cycling. Many had never exercised in a gym previously or completed circuit training. The MCEP  
203 provided the knowledge, skill, and confidence to perform other activities:

204 ‘*You see those gym things, I would have never walked into a gym, .... you would feel really*  
205 *awkward going in, you wouldn’t know what you were doing before that. At least now when I sit*  
206 *down, I know what I’m supposed to be doing.*’ (P10, FG2)

## 207 **Increase in confidence**

208 The delivery of the MCEP by clinical exercise professionals, with referrals and support from HCPs,  
209 was an essential aspect to the programme for participants ‘*The combination of all of them was very*  
210 *beneficial.*’ (P3, FG1) that lead to a sense of confidence and trust over other exercise opportunities.

211 The clinical exercise instructors were viewed positively ‘...*you trusted the staff that were looking*  
212 *after us, you knew that they were not going to put you in harm’s way, they are there to take care of you.*’  
213 (P7 FG1). Participants recognised that the instructors gradually progressed the programme, instilling  
214 confidence they were exercising at an appropriate level.

215 *'They do 3 stages [demonstrate 3 options] of what you can do yourself, you're not being pushed*  
216 *into working flat out, you do what you can.'* (M2 FG4)

217 Through participation in the MCEP, there was a noticeable improvement in exercise confidence.  
218 The MCEP broadened their awareness and perceived capability towards different forms of exercise 'We  
219 *thought we couldn't do [the exercises] and now we can do everything....'* (F2 FG3). It also increased their  
220 confidence to self-monitor exercise intensity.

221 *'More confidence anyway in yourself you know – you were afraid to do anything in case you were*  
222 *doing too much or too little .... you have that confidence that you know you're able to do a lot*  
223 *more.'* (F2 FG3)

224 For many this sense of empowerment extended to exercising independently. After just three  
225 months many felt they had now overcome their initial fears of unsupervised exercise.

226 *'my daughter has a treadmill at home, and I was afraid to go on it, but I go on it now you know'*  
227 (F2 FG4)

228 *'Before I wouldn't know what exercises to do or anything like that and it's great to be able to do*  
229 *them at home, now that I understand what I should and shouldn't do'* (F1 FG4)

## 230 **Life beyond illness**

231 The MCEP gave participants something to 'look forward to' and provided many benefits that had  
232 an impact on their day-to-day living, and they wanted to continue this positive trajectory. There was a  
233 sense of 'moving on' from their illness. They talked about the programme/instructors making them feel  
234 normal again and that they were no longer defined by their condition.

235 *'.. they don't treat us as recovering patients, and you're no longer a patient. That's a huge thing*  
236 *.... and it's by being targeted normally that you're well able to do this.* (M3 FG 4)

237 Their confidence, courage, energy, and outlook on life had improved in just 10 weeks and there  
238 was a realisation that ‘...the illness isn’t the end of the road...’ (M2 FG3)

## 239 **Drivers of Engagement**

240 This theme contains three sub-themes; Importance of scheduled exercise; Social connections; and  
241 Enjoyment. These cover a variety of factors that motivated patients to engage with the MCEP and  
242 appeared to facilitate adherence.

### 243 **Importance of scheduled exercise**

244 Many lacked the motivation to exercise, admitting they were not inclined to exercise by  
245 themselves: ‘you will not do it at home, you will not do it by yourself.’ (P1 FG1). The MCEP created an  
246 opportunity to maintain their exercise beyond the hospital setting:

247 *‘You see what happens is you go and have heart problems and you get it sorted out and you go to*  
248 *the cardiac rehab up in Sligo hospital, which is very good. You get hooked up to machines and*  
249 *everything but then you get sent home and you're told carry on walking with this and within a*  
250 *month you go back to your normal self and you're not doing anything.’ (P1 FG1)*

251 The scheduled nature of the MCEP was deemed important for adherence and fostered  
252 commitment: “You know you had two dates in the week you had to meet and otherwise you might have  
253 done nothing.’ (P8, Int. 1).

### 254 **Social connections**

255 The social connections among the participants appeared to motivate engagement with the MCEP  
256 and, for some, started before they ever entered the programme. Although many engaged with the  
257 programme initially because they were referred through the hospital, some were also influenced by  
258 recommendations from other participants ‘anyone I talked to recommended it highly.’ (F1, FG4) and ‘I

259 *heard about this from my sister-in-law so I rang up to see could I join up'* (M3 FG3). They appeared to  
260 value their recommendation and felt it encouraged their attendance at the programme.

261 Once attending participants particularly enjoyed the social nature of the programme. It  
262 encouraged continued participation and was one of the main drivers of exercise engagement. Participants  
263 described the sense of a collective reason for being there. Be it a similar condition to their own or another  
264 chronic condition, they felt *'everyone's in the same boat'* (M2 FG4) and *'all on the same wavelength'* (F1  
265 FG4). This made participants *'more comfortable'* (P4 FG1) being part of the programme and helped them  
266 form social bonds.

267 *'I felt this was great because we bounce off each other, meet people with the same situations that*  
268 *we have all been through and psychologically it was a chance to meet other people, talk...'* (M1  
269 FG3)

270 *'you come down here and you think everyone has had stents put in but it's not, people have had*  
271 *different problems and you just start talking to people and it makes people at ease more...'* (M4  
272 FG3)

273 There was evidence of social comparison influencing beliefs in their ability. Some felt *'put at ease'*  
274 by comparing their medical history with other participants and some viewed it rather light-heartedly.

275 *'I'm not as bad as I thought I was [laughing] I've only 2 stents...'* (M3 FG3)

276 *'...we were counting who had the more stents at this stage you know we found out there's always*  
277 *someone better or worse than you'* (M1, FG3)

278 This social comparison gave a sense that if others with a similar or even worse condition to  
279 themselves could exercise then they could too. *'...well, if they can do it so can I.'* (P2 FG1)

280 Participants compared themselves to new people entering the programme and realised their own  
281 ability had improved from when they started. They also talked about offering support to new people,  
282 encouraging them to stick with it and they would gradually progress.

283 *'You see new people coming in now and they aren't able to do what we can do, and we were once*  
284 *them.... we see them kind of struggling and we say don't try to do what we are doing because you*  
285 *won't be able for it ...'* (M1 FG3)

286 The main component of the MCEP that fostered the social support was the post-class cup of tea  
287 *'it's the social gathering as well.'* (M1 FG3). It provided an opportunity for conversations about their  
288 medical conditions and other unrelated topics *'...the chat can be about anything.'* (M2 FG4).

289 The importance of the social support and the camaraderie they got from each other was evident from all  
290 participants to the extent that one described it the *'centre piece of this whole thing.'* (M3 FG4)

291 *'It was the motivational encouragement you got from others [in the group]'* (FG1 P3)

## 292 **Enjoyment**

293 Enjoyment in the programme appeared to foster motivation and exercise engagement. Most  
294 participants talked about the exercise as being 'enjoyable' and 'fun', some were even surprised they found  
295 it fun. *'We had fun too, a lot of laughter and that's very important too'* (P3 FG1). The circuits session, in  
296 particular, was associated with fun *'The wit and the banter that goes on – makes it for everybody'* (M2  
297 FG3).

298 Participants enjoyed exercising to music and found it motivating. Music added meaning and made  
299 the exercise easier and more interesting.

300 *'... try to do an exercise and no music, it's totally different, meaningless.'* (F2 FG3)

301 Many expressed a preference for more gym sessions '*I thought the gym was the best*' (P12 FG2)  
302 indicating they '*found the gym more challenging*' (F2 FG3). Others preferred the circuits '*I liked all the*  
303 *different exercises, and we were not long doing them.... The time went around quicker.*' (P6 FG1) while  
304 others liked the combination of both. Essentially a desire for variety was evident '*vary it and give you a*  
305 *bit more interest, you know....*' (P2 FG1) with some even suggesting new alternatives such as making use  
306 of the athletics track or jiving class.

## 307 **Challenges to Keeping it (Exercise) Up**

308 Participants encountered challenges to keeping up the exercise. Subthemes included 'Barriers'  
309 and 'Dependency'.

### 310 **Barriers**

311 The primary barrier to attending the programme was the classes times clashing with family  
312 '*clashed with dropping off kids and grandkids*' (F1, FG4) and work '*I hadn't the time to do it all the time*  
313 *because I was working*' (P10, FG2) commitments. Although most preferred an early morning time slot,  
314 there was concerns expressed about the dark winter mornings and the time one would have to get up if  
315 they had any distance to travel.

### 316 **Dependency**

317 A key enabler of the MCEP was the availability of medical oversight and for most that was enough,  
318 for others there was a risk it was breeding medical dependency. For the first inducted group, medical  
319 personnel from the hospital were always on site and valued by participants.

320 *It [medical support] was automatically there, we had the support, and it was always at the back*  
321 *of your mind, they are there and that is great.* (P2, FG1)

322 From the second inducted group onwards, the medical personnel were only on site on certain  
323 weeks. Participants seemed to miss the reassurance from the medical side *'I thought that was very good*  
324 *to have somebody professional like herself here all the time, I know with staff shortages but if for future*  
325 *references that we could have someone here professional all the time'* (M1 FG3) with them looking for the  
326 medical staff *'regularly to be here'* (M2 FG3)

327 The monitoring before and during the classes provided further reassurance of a safe exercise  
328 environment. Many noted the opportunity to have their blood pressure monitored as part of the pre-  
329 exercise health check giving them confidence *'It reassures you that you're ok for it.'* (F1, FG4) or getting  
330 their pulse check during the class through random heart rate measurements to ensure they were training  
331 in the correct training zone *'you can actually see them going around to each individual and they pick out*  
332 *somebody who's under stress and bring them out and measure their heart rate.'* (M3 FG4). While  
333 participants saw this as a positive addition to the programme it could indicate an overmedicalisation of  
334 exercise and create a dependency on the instructors/programme.

335 *'Getting your blood pressure taken ... it keeps you focused on it, otherwise when would you have*  
336 *it taken.... it's nice to know you're plodding along nicely.'* (F4, FG3)

337 Despite the increase in exercise self-efficacy evident for many, it appears others may not exercise  
338 by themselves, some went further expressing concern in relation to losing the support of the programme.  
339 One participant feared what would happen if the programme ceased and the impact on their health. *'I*  
340 *hope it continues this year so that I don't land up in hospital'* (P6, FG1). While another person referred to  
341 when there was a break in the programme, how they really missed it and felt themselves *'slip back'* (M3  
342 FG4).



## 343 Discussion

344 The present study aimed to explore cardiac patients' experience of the early transition to and  
345 participation in a MCEP, whilst also identifying dimensions that facilitated and hindered physical activity  
346 engagement. Three key themes emerged: *moving from fear to confidence*, *drivers of engagement*, and  
347 *challenges to keeping it (exercise) up*. A key finding was that patients experienced a transition from *fear*  
348 *to confidence* in the early weeks attending a MCEP. Fear of exercise in individuals following a cardiac  
349 event has been found in previous studies [39] and reported as a barrier to initiating independent exercise.  
350 Despite understanding that they should have continued to exercise following the hospital-based CR,  
351 participants were fearful and uncertain of how to undertake exercise and were fearful of exercising  
352 independently. This could imply they were not taught to be independently physically active upon leaving  
353 CR or that they didn't want to exercise independently. This supports the role of a long-term step-down  
354 programme, such as a MCEP, from the hospital setting with less involvement of HCPs. For most the MCEP  
355 appeared to reduce fear and develop confidence to exercise in class and independently.

356 The link between the MCEP and hospital gave participant's confidence in transitioning to the  
357 MCEP, and they felt it set the MCEP apart from a regular gym or community exercise class. The importance  
358 of the link between community and hospital setting was evident in previous research to ensure smooth  
359 transition into the community setting[18] and establishing this link has been suggested as a measure to  
360 better support this transition [14].

361 Notwithstanding the benefits of continuity and reassurance highlighted by participants attending  
362 the MCEP, there is some concern that the MCEP may be over-medicalising exercise (e.g., through regular  
363 BP & HR monitoring) and not supporting a transition to more independent physical activity and long-term  
364 exercise engagement. This could breed dependency on such supervision and monitoring. For some there  
365 were signs that the dependency had just moved from the hospital to the community setting. As the MCEP

366 programme is delivered for 60 min twice a week, participants are unlikely to achieve the recommended  
367 levels of aerobic exercise (at least 150-300min of moderate intensity aerobic exercise per week) [40]. It  
368 is a vehicle to assist them achieving the recommended two or more days per week of muscle -  
369 strengthening and functional balance activities [40]. There is an opportunity to encourage, educate, and  
370 empower the participants to increase their activity outside of class times that should be exploited.

371 The transition to the community setting can remove some of the sense of exercise as a medical  
372 treatment. Participants in the present study went so far as to saying the programme made them feel  
373 'normal' again. This is consistent with McNamara *et al* [13] who found that exercising in a community  
374 setting promoted a sense of normality to the exercise environment. They no longer identified themselves  
375 as patients but as participants in an exercise class.

376 Consistent with research focusing on long-term exercise maintenance for those with a cardiac  
377 condition, this study found that scheduled exercise; social connections; and enjoyment were motivators  
378 for exercise engagement. This provision of routine and structure has been found as a key enabler to  
379 maintain exercise in previous research [19, 18]. Martin and Woods [18] reported how participants  
380 protected their class times by never scheduling other commitments that would prevent them from  
381 attending. Exercise was part of their weekly routine. Hardcastle *et al* [19] also found the discipline and  
382 routine as important with participants believing the group would be expecting them to come resulting in  
383 a 'sense of duty' to attend.

384 Social support from fellow participants has been consistently identified as a key driver in exercise  
385 maintenance [18, 17, 19, 16]. The present study highlights that this social aspect can be developed very  
386 early in a programme and is fostered through the 'cup of tea and a chat'. People felt more comfortable  
387 exercising alongside others '*in the same boat*'; a phrase reported in other studies [18, 19].

388 A novel contribution of the present study to the literature is the evident harnessing of social  
389 comparison, whereby participants appeared to take comfort in and confidence from knowing they were  
390 not in the worst position. They were comparing their condition and exercise ability to others in the group,  
391 and this appeared to influence their perception of their ability to exercise. The behavioural change  
392 technique (BCT) of ‘facilitate social comparison’ has rarely been used in exercise interventions, and usually  
393 involves explicitly drawing attention to others’ performance to elicit comparisons. Williams and French  
394 [41] found higher physical activity effect sizes were achieved when interventions included this BCT along  
395 with five other BCTs (i.e., provide information on consequences of the behaviour, action planning,  
396 reinforcing effort or progress towards behaviour, provide instruction, and time management). It may be  
397 the case that social comparison works in tandem with modelling to increase self-efficacy in terms of  
398 observing similar individuals and favorably comparing one’s performance to that of others.

399 Enjoyment was another driver of exercise engagement that is consistent with previous research  
400 [17, 19]. Like Thow *et al* [17], participants expressed surprise at finding exercise fun indicating past  
401 experiences led them to believe exercise was not an enjoyable experience. Preferences differed and  
402 appealing to everyone and achieving the right balance is a challenge to the instructors. Music added to  
403 the enjoyment and was described as a key motivational aspect of the class, which has previously been  
404 noted as an important aspect of programme design in group exercise classes for older people [42].

405 Research carried out by Killingback *et al* [42] reported older people and individuals with CD  
406 expressed a preference for a non-gym environment. They saw gyms as boring or isolating. Morgan *et al*  
407 [43] carried out a systematic literature review on barriers to exercise referral schemes, which are similar  
408 to MCEP, and reported the gym as an intimidating environment unless activities were scheduled during  
409 off-peak hours. Previous studies appeared to use the gym for individual exercise prescription while other  
410 members were present. In the present study, participants were introduced to the gym in their group,  
411 and many expressed a preference for the gym, indicating that maybe if there were gym hours specific for

412 the older adult it would encourage greater enjoyment and adherence to gym training. There was evidence  
413 that some participants had planned to go independently to the gym with others they had met on the  
414 programme indicating the MCEP may have assisted them in the transition to a gym environment.

415 Participants identified family and work commitments as key barriers to continued participation in  
416 the programme. Similar findings have been observed previously [16, 20]. Although distance wasn't a  
417 barrier for those in the focus group (who had completed 10 weeks), it was mentioned as a reason some  
418 of the other participants had dropped out earlier in the programme. Barriers such as cost and other health  
419 problems, which have been noted in other studies [20, 39, 16], did not appear to hinder PA engagement.  
420 This may indicate those still attending at 10 weeks were maybe physically more able having undergone  
421 hospital-based CR and better off financially. However, interviews with those who dropped out  
422 would provide further insights.

## 423 **Limitations**

424 All participants in this study had completed the first 10 weeks of the MCEP with full intentions of  
425 continuing and may be a somewhat biased sample. The present study did not include those that had  
426 dropped out. Participants were those from a single MCEP in Sligo, Ireland, and our findings may therefore  
427 not be generalizable to other programmes. Finally, despite participants being informed that their  
428 responses would be anonymous, they were aware that these results would be seen by programme  
429 coordinators, and this may have further biased their responses.

## 430 **Strengths**

431 The MCEP was a service as opposed to an exercise programme designed specifically for research  
432 purposes only and so this study explored implementation of an exercise programme in a 'real world'  
433 setting.

## 434 **Conclusions**

435           The overarching theme was a transition from fear to exercise confidence following participation  
436 in the MCEP. The predominant drivers of exercise engagement were social support, enjoyment, and  
437 routine. A novel finding that emerged from this study is that participation in the MCEP in the early stages  
438 could be viewed as a double-edged sword. Undoubtedly the programme provided an exercise outlet to  
439 encourage continued exercise beyond the hospital setting, however there were signs participants were  
440 dependant on the exercise programme and were less likely to exercise outside of it that could hinder their  
441 ability to achieve PA guidelines. A further novel finding was the evident use of social comparison to  
442 provide favourable valuations of performance and increased exercise confidence. Future interventions  
443 that reduce the medicalisation of exercise, actively encourage, educate, and facilitate participants to  
444 exercise outside of the MCEP using evidence-based behavioural change techniques including facilitating  
445 social comparison would be worthwhile. The study indicates that a MCEP has potential utility in providing  
446 an exercise outlet for cardiac patients to continue to exercise following hospital-based CR, making this a  
447 sustainable model long term.

## 448 **Acknowledgements**

449 We would like to acknowledge all study participants for their time and contribution and all research  
450 moderators who conducted the focus groups. The MCEP was based on the MedEx/ExWell Medical  
451 programme and thank Noel McCaffery and his team for supporting this project and the clinical exercise  
452 instructors in delivering the MCEP.

## References

1. Wilkins E, Wilson L, Wickramasinghe K, Bhatnagar P, Leal J, Luengo-Fernandez R et al. European cardiovascular disease statistics 2017. Brussels: European Heart Network. 2017.
2. McGill P. Illustrating Ageing in Ireland North and South: Key Facts and Figures. Belfast: Centre for Ageing Research and Development in Ireland 2010.
3. Dibben G, Faulkner J, Oldridge N, Rees K, Thompson DR, Zwisler AD et al. Exercise-based cardiac rehabilitation for coronary heart disease. *Cochrane Database of Systematic Reviews*. 2021(11). doi:10.1002/14651858.CD001800.pub4.
4. Piepoli MF, Abreu A, Albus C, Ambrosetti M, Brotons C, Catapano AL et al. Update on cardiovascular prevention in clinical practice: A position paper of the European Association of Preventive Cardiology of the European Society of Cardiology. *European Journal of Preventive Cardiology*. 2019;2047487319893035. doi:10.1177/2047487319893035.
5. Ji H, Fang L, Yuan L, Zhang Q. Effects of Exercise-Based Cardiac Rehabilitation in Patients with Acute Coronary Syndrome: A Meta-Analysis. *Med Sci Monit*. 2019;25:5015-27. doi:10.12659/msm.917362.
6. Pesah E, Supervia M, Turk-Adawi K, Grace SL. A Review of Cardiac Rehabilitation Delivery Around the World. *Progress in Cardiovascular Diseases*. 2017;60(2):267-80. doi:<https://doi.org/10.1016/j.pcad.2017.08.007>.
7. Irish Heart Foundation. Cardiac Rehabilitation. 2018. <https://irishheart.ie/your-health/heart-stroke-tests-procedures/cardiac-rehabilitation/>. Accessed 17th July 2018.
8. I.A.C.R. What we do. 2021. <https://iacronline.ie/what-we-do.php>. Accessed 5th September 2021.
9. Price KJ, Gordon BA, Bird SR, Benson AC. A review of guidelines for cardiac rehabilitation exercise programmes: Is there an international consensus? *Eur J Prev Cardiol*. 2016;23(16):1715-33.
10. Bellg AJ. Maintenance of Health Behavior Change in Preventive Cardiology. *Behavior Modification*. 2003;27(1):103-31. doi:10.1177/0145445502238696.
11. Willmer KA, Waite M. Long-term benefits of cardiac rehabilitation: a five-year follow-up of community-based phase 4 programmes. *The British Journal of Cardiology*. 2009;16:73-7.
12. Fletcher SM, McBurney H. Strategic Moments: Identifying opportunities to engage clients in attending cardiac rehabilitation and maintaining lifestyle changes. *Journal of Cardiopulmonary Rehabilitation and Prevention*. 2016;36(5):346-51.
13. McNamara RJ, McKeough ZJ, Mo LR, Dallimore JT, Dennis SM. Community-based exercise training for people with chronic respiratory and chronic cardiac disease: a mixed-methods evaluation. *Int J Chron Obstruct Pulmon Dis*. 2016;11:2839-50. doi:10.2147/copd.s118724.
14. Clark AM, Mundy C, Catto S, MacIntyre PD. Participation in Community-Based Exercise Maintenance Programs After Completion of Hospital-Based Cardiac Rehabilitation: A Mixed-Method Study. *Journal of Cardiopulmonary Rehabilitation and Prevention*. 2011;31(1).
15. Ozemek C, Squires RW. Enrollment and Adherence to Early Outpatient and Maintenance Cardiac Rehabilitation Programs. *Journal of Cardiopulmonary Rehabilitation and Prevention*. 2021;41(6).
16. Dunn S, Lark S, Fallows S. Identifying Similar and Different Factors Effecting Long-Term Cardiac Exercise Rehabilitation Behavior Modification Between New Zealand and the United Kingdom. *Journal of Physical Activity & Health*. 2014;11(5):1019-24.
17. Thow M, Rafferty D, Kelly H. Exercise motives of long-term phase IV cardiac rehabilitation participants. *Physiotherapy*. 2008;94(4):281-5. doi:<http://dx.doi.org/10.1016/j.physio.2008.06.001>.
18. Martin AM, Woods CB. What Sustains Long-Term Adherence to Structured Physical Activity After a Cardiac Event? *Journal of Aging & Physical Activity*. 2012;20(2):135-47.

19. Hardcastle SJ, McNamara K, Tritton L. Using Visual Methods to Understand Physical Activity Maintenance following Cardiac Rehabilitation. *PloS one*. 2015;10(9):e0138218-e. doi:10.1371/journal.pone.0138218.
20. Horwood H, Williams MJA, Mandic S. Examining Motivations and Barriers for Attending Maintenance Community-Based Cardiac Rehabilitation Using the Health-Belief Model. *Heart, Lung and Circulation*. 2015;24(10):980-7. doi:<https://doi.org/10.1016/j.hlc.2015.03.023>.
21. Carmody TP, Senner JW, Malinow MR, Matarazzo JD. Physical exercise rehabilitation: Long-term dropout rate in cardiac patients. *Journal of Behavioral Medicine*. 1980;3(2):163-8. doi:10.1007/BF00844988.
22. Yohannes AM, Yalfani A, Doherty P, Bundy C. Predictors of drop-out from an outpatient cardiac rehabilitation programme. *Clin Rehabil*. 2007;21(3):222-9. doi:10.1177/0269215506070771.
23. Lavin D, Hevey D, McGee H, De La Harpe D, Kiernan M, Shelley E. Cardiac rehabilitation services in Ireland: The impact of a coordinated national development strategy. *Irish journal of medical science*. 2005;174:33-8. doi:10.1007/BF03168979.
24. I.A.C.R. Phase 4 Providers - Irish Association of Cardiac Rehabilitation. 2020. <http://www.iacr.info/phase-4-providers/>. Accessed 8th August 2020.
25. Kwan YH, Ong KY, Tay HY, Chang JY. Heart Wellness Programme: a pilot community-based cardiac rehabilitation programme in a multiethnic society. *Singapore Medical Journal*. 2016;57(4):188-90. doi:10.11622/smedj.2016073.
26. Ong KY, Yap E, May Fen Chia Y, Tay HY, Ting P, Chan SY et al. Impact of Community-Based Cardiac Rehabilitation on Clinical Parameters of Patients with Cardiovascular Diseases. *ASEAN Heart J*. 2016;24:5. doi:10.7603/s40602-016-0005-4.
27. Zhang Y, Cao H, Jiang P, Tang H. Cardiac rehabilitation in acute myocardial infarction patients after percutaneous coronary intervention: A community-based study. *Medicine (Baltimore)*. 2018;97(8):e9785. doi:10.1097/md.00000000000009785.
28. Seki E, Watanabe Y, Shimada K, Sunayama S, Onishi T, Kawakami K et al. Effects of a phase III cardiac rehabilitation program on physical status and lipid profiles in elderly patients with coronary artery disease: Juntendo Cardiac Rehabilitation Program (J-CARP). *Circ J*. 2008;72(8):1230-4.
29. Pedersen BK, Saltin B. Exercise as medicine - evidence for prescribing exercise as therapy in 26 different chronic diseases. *Scand J Med Sci Sports*. 2015;25 Suppl 3:1-72. doi:10.1111/sms.12581.
30. Desveaux L, Beauchamp M, Goldstein R, Brooks D. Community-based exercise programs as a strategy to optimize function in chronic disease: a systematic review. *Med Care*. 2014;52(3):216-26. doi:10.1097/mlr.0000000000000065.
31. Woods C, McCaffrey N, Furlong B, Fitzsimons-D'Arcy L, Murphy M, Harrison M et al. National Exercise Referral Framework 2016.
32. O'Brien BC, Harris IB, Beckman TJ, Reed DA, Cook DA. Standards for Reporting Qualitative Research: A Synthesis of Recommendations. *Academic Medicine*. 2014;89(9).
33. BACPR. British Association for Cardiovascular Prevention and Rehabilitation, Level 4 Cardiac Exercise Instructor Training Module. 4th ed. Leeds: Human Kinetics; 2016.
34. Braun V, Clarke V. *Successful Qualitative Research; A practical guide for beginners*. 1st ed. London: SAGE; 2013.
35. Hayfield N, Huxley C. Insider and Outsider Perspectives: Reflections on Researcher Identities in Research with Lesbian and Bisexual Women. *Qualitative research in psychology*. 2015;12(2):91-106. doi:10.1080/14780887.2014.918224.
36. Thompson N, Wilkie S. 'I'm just lost in the world': the impact of blue exercise on participant well-being. *Qualitative research in sport, exercise and health*. 2021;13(4):624-38. doi:10.1080/2159676X.2020.1761433.

37. Braun V, Clarke V. Thematic Analysis. In: Cooper H, editor. APA Handbook of Research Methods in Psychology. American Psychological Association; 2012. p. 57-71.
38. Braun V, Clarke V. Can I use TA? Should I use TA? Should I not use TA? Comparing reflexive thematic analysis and other pattern-based qualitative analytic approaches. *Counselling and psychotherapy research*. 2021;21(1):37-47. doi:10.1002/capr.12360.
39. Rogerson MC, Murphy BM, Bird S, Morris T. "I don't have the heart": a qualitative study of barriers to and facilitators of physical activity for people with coronary heart disease and depressive symptoms. *The international journal of behavioral nutrition and physical activity*. 2012;9(1):140-. doi:10.1186/1479-5868-9-140.
40. Dempsey PC, Friedenreich CM, Leitzmann MF, Buman MP, Lambert E, Willumsen J et al. Global Public Health Guidelines on Physical Activity and Sedentary Behavior for People Living With Chronic Conditions: A Call to Action. *Journal of Physical Activity and Health*. 2021;18(1):76-85. doi:10.1123/jpah.2020-0525.
41. Williams SL, French DP. What are the most effective intervention techniques for changing physical activity self-efficacy and physical activity behaviour—and are they the same? *Health Education Research*. 2011;26(2):308-22. doi:10.1093/her/cyr005.
42. Killingback C, Tsofliou F, Clark C. Older people's adherence to community-based group exercise programmes: a multiple-case study. *BMC Public Health*. 2017;17(1):115. doi:10.1186/s12889-017-4049-6.
43. Morgan F, Battersby A, Weightman AL, Searchfield L, Turley R, Morgan H et al. Adherence to exercise referral schemes by participants – what do providers and commissioners need to know? A systematic review of barriers and facilitators. *BMC Public Health*. 2016;16(1):227-. doi:10.1186/s12889-016-2882-7.

## Statements and Declarations

**Financial Disclosure Statement:** The author(s) received no specific funding for this work.

**Competing interests:** The author(s) declare no competing interests exist.

**Author contributions: Conceptualisation of the project:** Joanne Regan-Moriarty, Azura Youell, Brona

Kehoe, Niall Moyna, Andrew McCarren; **Design and development of methodology:** Joanne Regan-

Moriarty, Maire McCallion, Azura Youell, Niall Moyna, Brona Kehoe; **Provision of resources:** Audrey

Collery, Maire McCallion, Azura Youell; **Data collection:** Maire McCallion, Azura Youell; **Analysis of data:**

Joanne Regan-Moriarty, Brona Kehoe, Sarah Hardcastle, Maire McCallion; **Creation of initial draft:**

Joanne Regan-Moriarty; **Review, editing and approval of final manuscript:** All authors.



**Ethical Approval:** This study was conducted according to the guidelines laid down in the Declaration of Helsinki and all procedures involving research study participants were approved by SUH Research Ethics Committee (REF No.: 579).

**ORCID iD:** Joanne Regan-Moriarty <https://orcid.org/0009-0005-8881-6913>

## **Supporting information**

**S1 Appendix. Standards for reporting qualitative research (SRQR)**

**S2 Appendix. Topic guide followed by moderator in each focus group**

**S3 Appendix. Themes, subthemes and supporting quotes**
